# Supplementary material for: A new peptide vaccine OCV-501: in vitro pharmacology and phase 1 study in patients with acute myeloid leukemia
Source: Springer Nature journal article supplement (doi:10.1007/s00262-017-1981-3), 2017-03-20
Supplement: MOESM1 [file 12157144]

# Supplementary

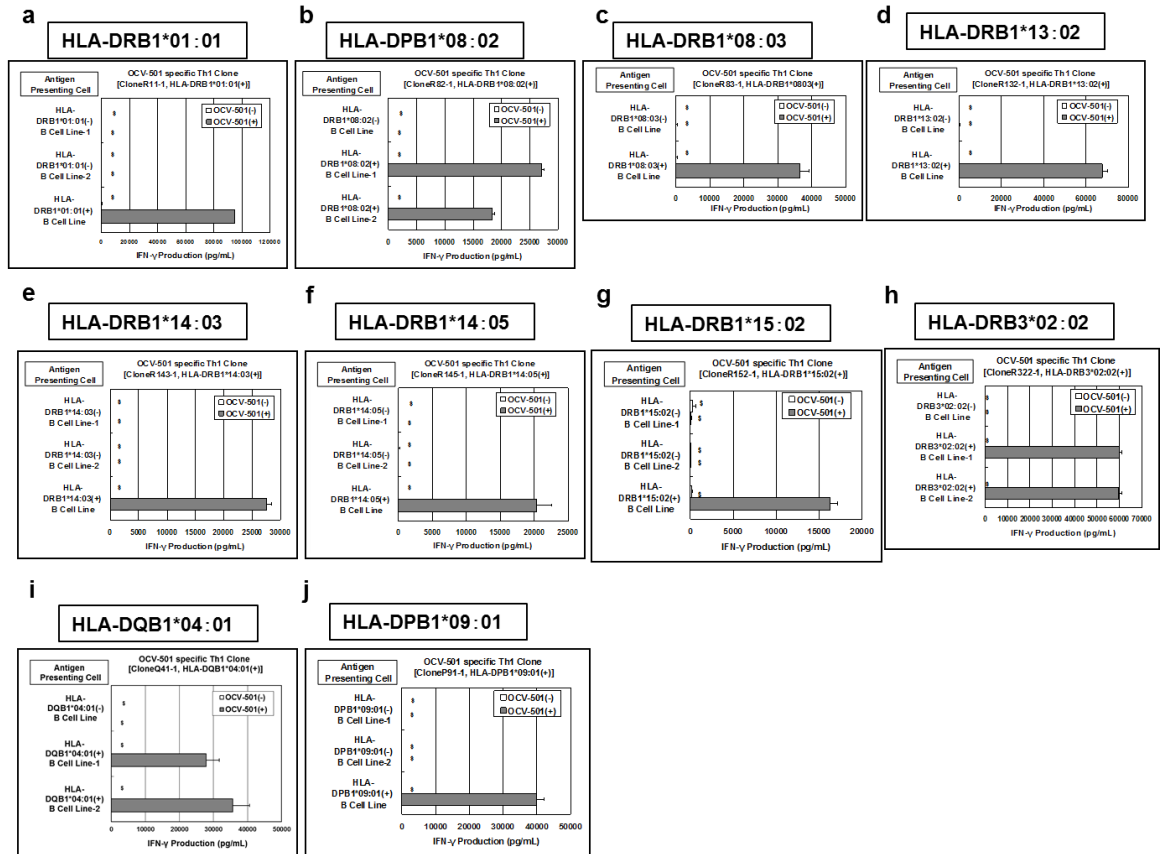

**Supplementary Fig. 1** Efficacy pharmacology studies of OCV-501 using various T-cell clones

B-LCL: B-lymphoblastoid cell line, Th1: type 1 T-helper cell.

HLA-restricted T-cell activation by OCV-501 using various human T-cell clones. As an index of T-cell activating effect, the produced IFN- $\gamma$  from OCV-501-specific Th1 clone was estimated in the culture of each HLA class II(+) or HLA class II(-) B-LCLs pulsed with or without OCV-501 [Clone R11-1: HLA-DRB1\*01:01(+), Clone R82-1: HLA-DRB1\*08:02(+), Clone R83-1: HLA-DRB1\*08:03(+), Clone R132-1: HLA-DRB1\*13:02(+), Clone R143-1: HLA-DRB1\*14:03(+), Clone R145-1: HLA-DRB1\*14:05(+), Clone R152-1: HLA-DRB1\*15:02(+), Clone R322-1: HLA-DRB3\*02:02(+), Clone Q41-1: HLA-DQB1\*04:01, and Clone P91-1: HLA-DPB1\*09:01(+)] [data are expressed as mean  $\pm$  SD, triplicates, \$: error bar was calculated by extrapolated data]

Supplementary Table 1 Bone marrow examination

| Dose             | Subject ID | Time Point       | Nucleated<br>Cell Count<br>(10 <sup>4</sup> /uL) | Myeloblast<br>(%) | Neutrophil<br>(%) | Basophil<br>(%) | Eosinophil<br>(%) | Monocyte<br>(%) | Lymphocyte<br>(%) | Atypical<br>Lymphocyte<br>(%) |
|------------------|------------|------------------|--------------------------------------------------|-------------------|-------------------|-----------------|-------------------|-----------------|-------------------|-------------------------------|
| 0.3 mg           | 001-0001   | Screening        | 4.580                                            | 1.0               | 29.2              | 0.2             | 4.4               | 5.2             | 18.2              | 0.0                           |
|                  |            | End of Treatment | 2.600                                            | 1.0               | 29.2              | 0.8             | 4.6               | 7.4             | 22.4              | 0.0                           |
|                  | 002-0001   | Screening        | 33.875                                           | 0.7               | 41.5              | 0.0             | 2.0               | 3.0             | 23.7              | 0.0                           |
|                  |            | End of Treatment | 60.150                                           | 1.0               | 41.2              | 0.0             | 0.2               | 0.3             | 12.0              | 0.0                           |
|                  | 002-0002   | Screening        | 4.800                                            | 0.8               | 23.6              | 0.0             | 2.0               | 2.0             | 34.8              | 0.0                           |
|                  |            | End of Treatment | 7.325                                            | 1.7               | 31.0              | 0.0             | 1.7               | 6.7             | 24.7              | 0.0                           |
| 1.0 mg           | 001-0002   | Screening        | 2.310                                            | 1.2               | 35.0              | 0.6             | 5.0               | 9.2             | 21.8              | 0.0                           |
|                  |            | End of Treatment | 3.060                                            | 0.8               | 24.6              | 0.4             | 8.4               | 6.0             | 17.2              | 0.0                           |
|                  | 002-0003   | Screening        | 4.800                                            | 1.2               | 40.8              | 0.0             | 2.4               | 6.2             | 18.4              | 0.0                           |
|                  |            | End of Treatment | 2.650                                            | 2.4               | 27.2              | 0.0             | 2.4               | 5.6             | 14.4              | 0.0                           |
|                  | 002-0004   | Screening        | 2.034                                            | 1.2               | 34.2              | 0.0             | 0.8               | 5.0             | 12.6              | 0.0                           |
|                  |            | End of Treatment | 18.500                                           | 1.6               | 32.8              | 0.0             | 5.6               | 4.8             | 12.0              | 0.0                           |
| 3.0 mg           | 001-0003   | Screening        | 7.300                                            | 1.0               | 34.6              | 0.4             | 1.0               | 2.2             | 11.0              | 0.0                           |
|                  |            | End of Treatment | 0.490                                            | 0.0               | 36.5              | 0.5             | 1.0               | 7.0             | 37.0              | 0.0                           |
|                  |            | Unscheduled      | 9.330                                            | 0.8               | 31.6              | 0.0             | 0.4               | 1.6             | 11.2              | 0.0                           |
|                  | 001-0004   | Screening        | 17.140                                           | 0.4               | 32.2              | 0.0             | 0.2               | 1.4             | 9.8               | 0.0                           |
|                  |            | End of Treatment | 4.310                                            | 3.0               | 28.4              | 0.2             | 0.8               | 7.2             | 14.0              | 0.0                           |
|                  | 002-0005   | Screening        | 1.650                                            | 2.8               | 44.0              | 0.0             | 0.8               | 2.8             | 8.0               | 0.0                           |
| End of Treatment |            | 4.8750           | 1.2                                              | 43.2              | 0.0               | 5.6             | 4.0               | 7.6             | 0.0               |                               |

Supplementary Table 2 Specific Delayed-type Hypersensitivity Reaction after OCV-501 Administration

| Dose   | Subject ID | Time Point       | Redness (mm) | Induration (mm) |
|--------|------------|------------------|--------------|-----------------|
| 0.3 mg | 001-0001   | Screening        | 0            | 0               |
|        |            | End of Treatment | 2            | 0               |
|        | 002-0001   | Screening        | 0            | 0               |
|        |            | End of Treatment | 1            | 0               |
|        | 002-0002   | Screening        | 0            | 0               |
|        |            | End of Treatment | 7            | 7               |
| 1.0 mg | 001-0002   | Screening        | 1            | 0               |
|        |            | End of Treatment | 4            | 0               |
|        | 002-0003   | Screening        | 0            | 0               |
|        |            | End of Treatment | 0            | 0               |
|        | 002-0004   | Screening        | 0            | 0               |
|        |            | End of Treatment | 0            | 0               |
| 3.0 mg | 001-0003   | Screening        | 0            | 0               |
|        |            | End of Treatment | 1            | 0               |
|        | 001-0004   | Screening        | 0            | 0               |
|        |            | End of Treatment | 0            | 0               |
|        | 002-0005   | Screening        | 0            | 0               |
|        |            | End of Treatment | 6            | 8               |

Supplementary Table 3 Immunoglobulin G (IgG) level

| Dose   | Subject ID | Time Point       | Time of Blood Collection | IgG Level (mg/dL) |
|--------|------------|------------------|--------------------------|-------------------|
| 0.3 mg | 001-0001   | Screening        | 9:59                     | 1387              |
|        |            | End of Treatment | 10:47                    | 1601              |
|        |            | Post Treatment   | 9:20                     | 1725              |
|        | 002-0001   | Screening        | 8:10                     | 1097              |
|        |            | End of Treatment | 10:49                    | 1041              |
|        |            | Post Treatment   | 9:40                     | 1106              |
|        | 002-0002   | Screening        | 8:00                     | 1499              |
|        |            | End of Treatment | 10:52                    | 1582              |
|        |            | Post Treatment   | 9:27                     | 1417              |
| 1.0 mg | 001-0002   | Screening        | 8:17                     | 1452              |
|        |            | End of Treatment | 11:11                    | 1437              |
|        |            | Post Treatment   | 11:10                    | 1394              |
|        | 002-0003   | Screening        | 8:13                     | 1410              |
|        |            | End of Treatment | 11:01                    | 1336              |
|        |            | Post Treatment   | 11:10                    | 1330              |
|        | 002-0004   | Screening        | 12:10                    | 1327              |
|        |            | End of Treatment | 11:27                    | 1266              |
|        |            | Post Treatment   | 13:39                    | 1440              |
| 3.0 mg | 001-0003   | Screening        | 12:03                    | 1140              |
|        |            | End of Treatment | 13:07                    | 1285              |
|        |            | Post Treatment   | 12:08                    | 1224              |
|        | 001-0004   | Screening        | 6:58                     | 1403              |
|        |            | End of Treatment | 10:55                    | 1271              |
|        |            | Post Treatment   | 10:56                    | 1298              |
|        | 002-0005   | Screening        | 9:14                     | 1499              |
|        |            | End of Treatment | 11:45                    | 1522              |
|        |            | Post Treatment   | 11:38                    | 1491              |
